# Supplementary material
Source: HighWire-hosted journal article supplement (https://bmjpaedsopen.bmj.com/content/6/1/e001649)
Supplement: inline-supplementary-material-1 [file inline-supplementary-material-1.pdf]

**Supplementary Table 1: Sociodemographic characteristics and clinical presentation of 27****Kawasaki Disease patients in a tertiary-care hospital, Dubai, United Arab Emirates (2012-2020).**

|                             | Number |
|-----------------------------|--------|
| <b>Year of Presentation</b> |        |
| 2012-2014                   | 2      |
| 2015-2017                   | 11     |
| 2018-2020                   | 14     |
| <b>Sex</b>                  |        |
| Male                        | 20     |
| Female                      | 7      |
| <b>Age Group (years)</b>    |        |
| 1-5                         | 17     |
| 6-10                        | 5      |
| <b>Nationality</b>          |        |
| Asian                       | 10     |
| Middle Eastern              | 7      |
| European                    | 5      |
| African                     | 4      |
| North American              | 1      |
| <b>Seasonality</b>          |        |
| Winter                      | 11     |
| Spring                      | 7      |
| Autumn                      | 5      |

|                       |    |
|-----------------------|----|
| Summer                | 4  |
|                       |    |
|                       |    |
|                       |    |
| Type of KD            |    |
| Typical (Complete)    | 23 |
| Atypical (Incomplete) | 4  |

KD, Kawasaki Disease.
